# Supplementary material for: Using Primary Care and Emergency Department Datasets for Researching Violence Victimisation in the UK: A Methodological Review of Four Sources
Source: MDPI journal article supplement (doi:10.3390/socsci13030147), 2024-03-05
Supplement: s1 [file s1]

Archive with 1 entries (1 files):
- socsci-2814493-supplementary.pdf
