# Supplementary material for: Using Primary Care and Emergency Department Datasets for Researching Violence Victimisation in the UK: A Methodological Review of Four Sources
Source: MDPI journal article supplement (doi:10.3390/socsci13030147), 2024-03-05
Supplement: s1 [file s1 › socsci-2814493-supplementary.pdf]

Supplementary Table S1. International Classification of Disease (ICD-10) flags for violence.

| Dataset(s)                                                                                       | Variable for identifying violence | Code(s) for violence                                                                                                                                                                                                                                                                                                                                                                                                          |
|--------------------------------------------------------------------------------------------------|-----------------------------------|-------------------------------------------------------------------------------------------------------------------------------------------------------------------------------------------------------------------------------------------------------------------------------------------------------------------------------------------------------------------------------------------------------------------------------|
| HES Admitted Patient Care (APC), HES Outpatients, HES Adult Critical Care, HES A&E (some trusts) | 'Diagnosis Code'                  | T74.0 Neglect or abandonment<br>T74.1 Physical abuse (including child abuse)<br>T74.2 Sexual abuse<br>T74.3 Psychological abuse<br>T74.8 Other mixed forms<br>T74.9 Unspecified<br>X85-Y09 Assault by object entity<br>Y05 Sexual assault (bodily force)<br>Y06 Neglect and abandonment<br>Y07 Mental cruelty, physical abuse, sexual abuse, torture<br>Z63.0 Persisting control, hostility, criticism, physical violence*(1) |

1. Olive P. Intimate partner violence and clinical coding: issues with the use of the International classification of disease (ICD-10) in England. *Journal of Health Services Research & Policy*. 2018;23(4):212-21.
